# Supplementary material for: Pd/Co3O4–Pd/PdO formed in situ on the surface of the self-assembly ferrocenylimine Pd(ii)/Co(ii) monolayer for catalyzing the Suzuki cross-coupling reaction—formation, synergistic effect, and catalytic mechanism
Source: Royal Society of Chemistry journal article supplement (doi:10.1039/d3nj00457k), 2023-01-01
Supplement: d3nj00457k1.pdf [file d3nj00457k1.pdf]

## Supplementary Information

### **Pd/Co<sub>3</sub>O<sub>4</sub>-Pd/PdO formed in situ on the surface of the self-assembly ferrocenylimine Pd(II)/Co(II) monolayer for catalyzing Suzuki cross coupling reaction ----Formation, synergistic effect, and catalytic mechanism**

Penghui Han,<sup>1†</sup> Shuiqing Zhu,<sup>1†</sup> Bowen Yang,<sup>1</sup> Dongmei Huang,<sup>1</sup> Ruirui Ren,<sup>1</sup> Tiesheng Li,<sup>1\*</sup> Minghua Liu,<sup>2,3\*</sup> Yangjie Wu<sup>1\*</sup>

<sup>1</sup> College of Chemistry, Zhengzhou University, Kexuedadao 100, Zhengzhou, 450001, P. R. China

<sup>2</sup> Henan Institute of Advanced Technology, Zhengzhou University, Kexuedadao 100, Zhengzhou 450001, Henan Province, P.R. China.

<sup>3</sup> Beijing National Laboratory for Molecular Science, Institute of Chemistry, Chinese Academy of Sciences, Zhongguancun North First Street 2, Beijing 100190, P. R China.

**\*Corresponding author:** Tiesheng Li

E-mail: [lts34@zzu.edu.cn](mailto:lts34@zzu.edu.cn)

### Contents

**1. Figure caption-----Page 2**

**2. Table lists-----Page 9**

## 1. Figure caption

Fig. S1 FT-IR spectra of **GO**, **GO@APTES**, **GO@APTES-Fcl**, and **GO@APTES-Fcl-Pd/Co**.

Fig. S2 XRD spectra of **GO**, **GO@APTES**, **GO@APTES-Fcl** and **GO@APTES-Fcl-Pd/Co**.

Fig. S3 Raman spectra of **GO**, **GO@APTES**, **GO@APTES-Fcl** and **GO@APTES-Fcl-Pd/Co**.

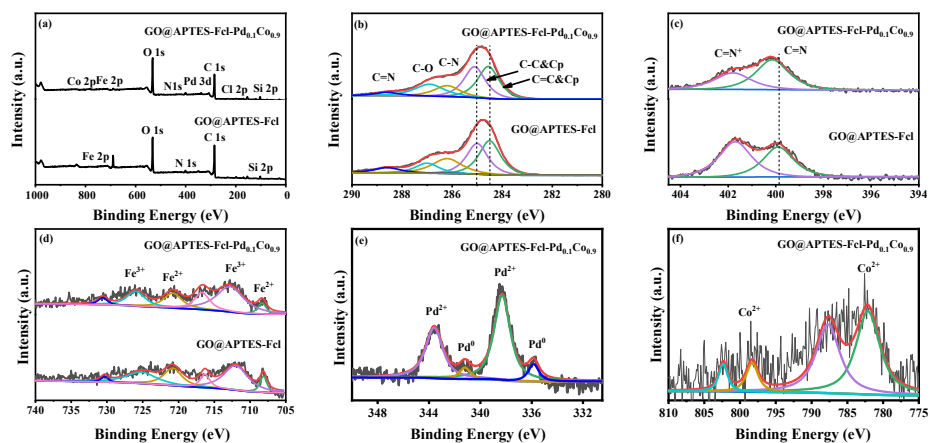

Fig. S4 (a) Survey XPS spectra of **GO@APTES-Fcl** and **GO@APTES-Fcl-Pd/Co**, HR-XPS of (b) C 1s, (c) N 1s, (d) Fe 2p, (e) Pd 3d, and (f) Co 2p.

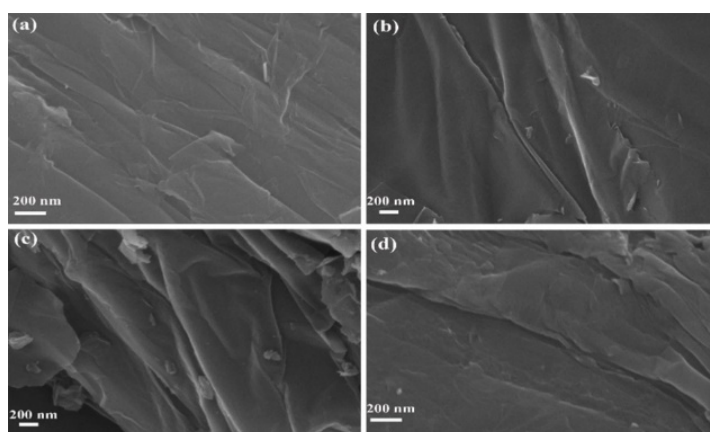

Fig. S5 SEM images of (a) **GO**, (b) **GO@APTES**, (c) **GO@APTES-Fcl**, (d) **GO@APTES-Fcl-Pd/Co**.

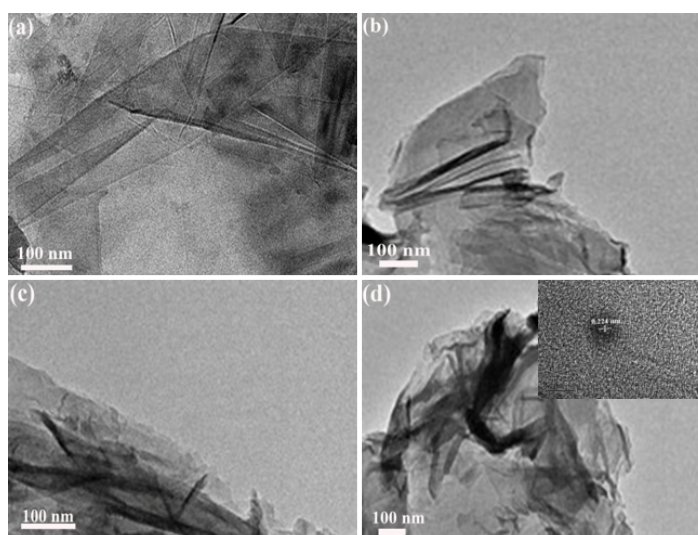

Fig. S6 TEM images of (a) **GO**, (b) **GO@APTES**, (c) **GO@APTES-Fcl**, (d) **GO@APTES-Fcl-Pd/Co**.

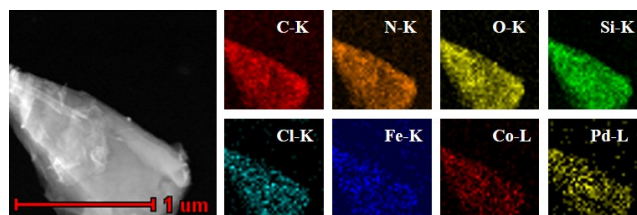

Fig. S7 TEM image and the corresponding elemental mapping analysis of **GO@APTES-Fcl-Pd/Co**.

Fig. S8 EIS of the catalyst on the ITO glass for **GO**, **GO@APTES**, **GO@APTES-Fcl**, **GO@APTES-Fcl-Pd/Co**.

Fig. S9 (a) N<sub>2</sub> adsorption-desorption isotherms and (b) the corresponding pore size distribution for **GO**, **GO@APTES**, **GO@APTES-Fcl**, **GO@APTES-Fcl-Pd/Co**.

Fig. S 10 XRD spectra of **Si-OH**, **Si@APTES**, **Si@APTES-Fcl**, **Si@APTES-Fcl-Pd/Co**.

Fig. S11 Water contact angle images of **Si-OH**, **Si@APTES**, **Si@APTES-Fcl**, **Si@APTES-Fcl-Pd/Co**.

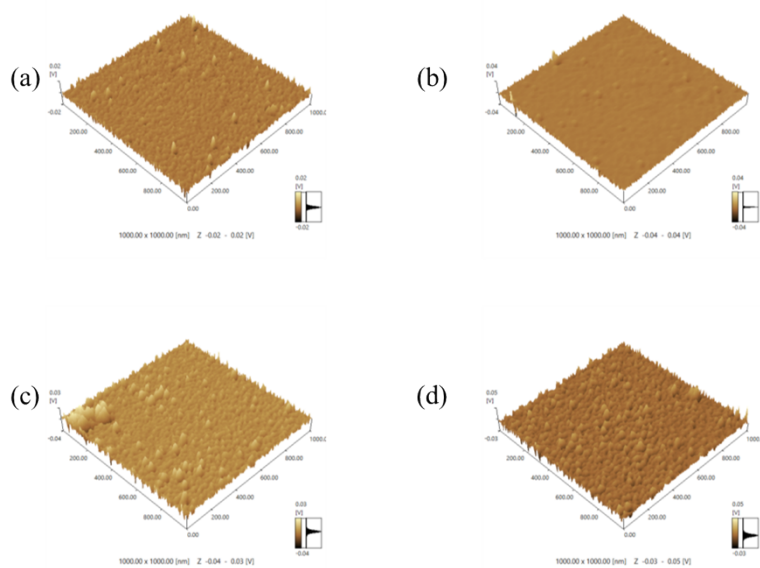

Fig. S12 AFM images of the surface topography of the modified silicon wafer (a) **Si-OH**, (b) **Si@APTES**, (c) **Si@APTES-Fcl**, (d) **Si@APTES-Fcl-Pd/Co**

Fig. S13 Hot filtration and kinetic experiment of  $\text{GO@APTES-Fcl-Pd}_{0.1}\text{Co}_{0.9}$ .

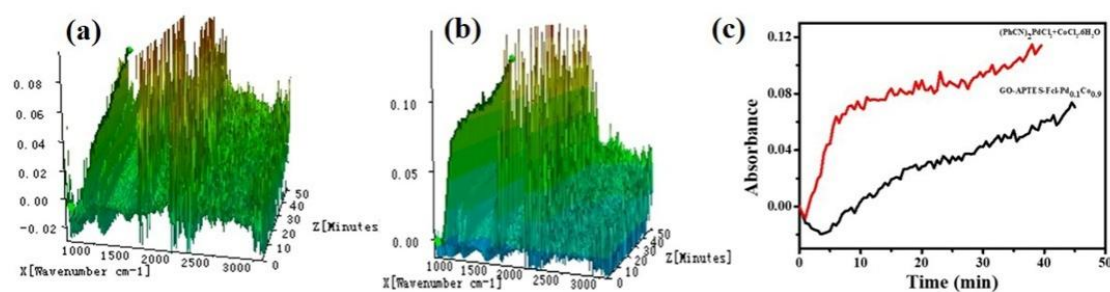

Fig. S14 React-IR plots over time for the formation of 4-Phenyltoluene by Suzuki reaction (a) 3D map catalyzed by  $\text{GO@APTES-Fcl-Pd}_{0.1}\text{Co}_{0.9}$ , (b) 3D map catalyzed by  $(\text{PhCN})_2\text{PdCl}_2/\text{CoCl}_2 \cdot 6\text{H}_2\text{O}$ , (c) Kinetic analysis of the reaction catalyzed by  $\text{GO@APTES-Fcl-Pd}_{0.1}\text{Co}_{0.9}$  (black line) and  $(\text{PhCN})_2\text{PdCl}_2/\text{CoCl}_2 \cdot 6\text{H}_2\text{O}$  (red line)

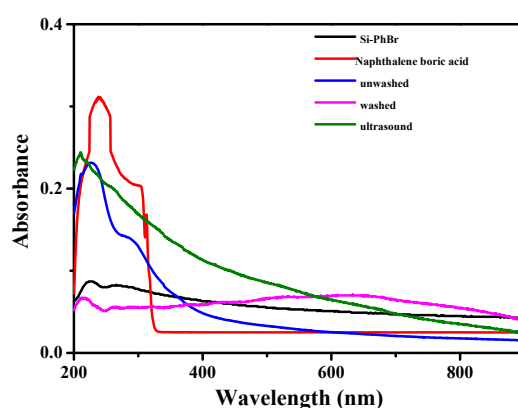

Fig. S15 UV spectra of **Si-PhBr** in the three-phase testing. Treatment: washed with solvents (DCM, EtOH, and MeOH) and ultrasonic. (naphthybronic acid, red; **Si-PhBr**, black; **Si-PhBr**[add  $\text{Si@APTES-Fcl-Pd}_{0.1}\text{Co}_{0.9}$  without wash], blue; **Si-PhBr** [added  $\text{GO@APTES-Fcl-Pd}_{0.1}\text{Co}_{0.9}$ , washed], pink).

Fig. S16 The varied ratios of Co(III)/Co(II) on the surface of **GO@APTES-Fcl-Pd<sub>0.1</sub>Co<sub>0.9</sub>** during catalysis and recycling.

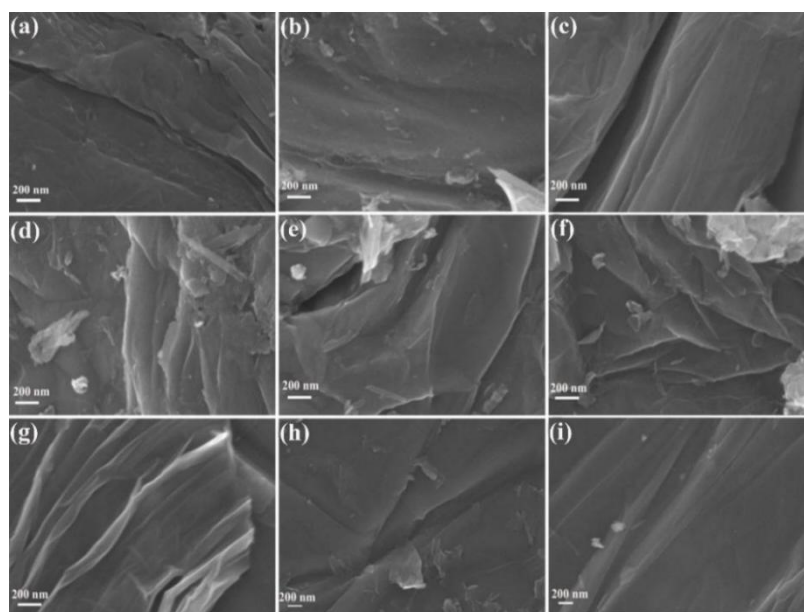

Fig. S17 SEM images of **GO@APTES-Fcl-Pd<sub>0.1</sub>Co<sub>0.9</sub>** (a) fresh, (b) 1st run, (c) 2nd run, (d) 3rd run, (e) 4th run, (f) 5th run, (g) 6th run, (h) 7th run, (i) 8th run

Fig. S18 XRD spectra of **GO@APTES-Fcl-Pd<sub>0.1</sub>Co<sub>0.9</sub>** in the process of recycles

Fig. S19 Raman spectra of **GO@APTES-Fcl-Pd<sub>0.1</sub>Co<sub>0.9</sub>** in the process of recycles

Fig. S20 FT-IR spectra of **GO@APTES-Fcl-Pd<sub>0.1</sub>Co<sub>0.9</sub>** in the process of recycles.



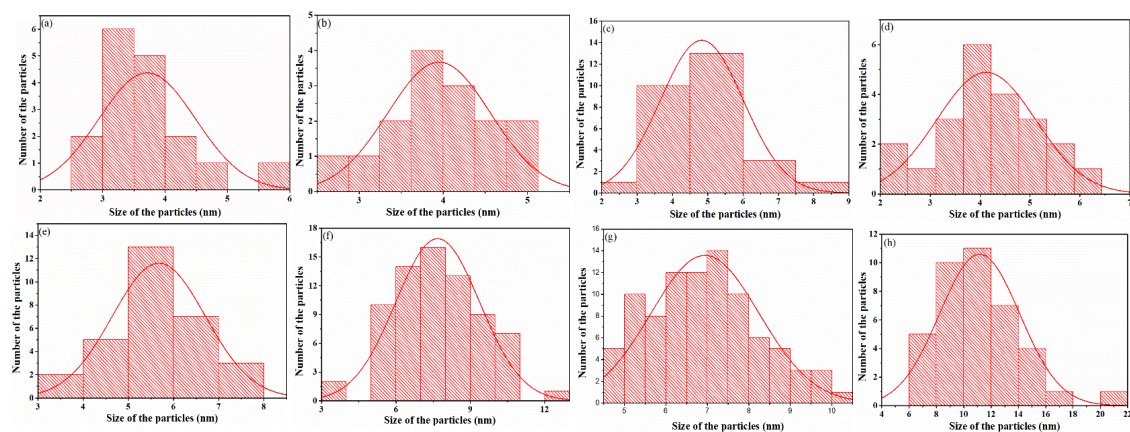

Fig. S21 histogram of the particles diameters in the process of recycling.: (a) 1<sup>st</sup> run, (b) 2<sup>nd</sup> run, (c) 3<sup>rd</sup> run, (d) 4<sup>th</sup> run, (e) 5<sup>th</sup> run, (f) 6<sup>th</sup> run, (g) 7<sup>th</sup> run, (h) 8<sup>th</sup> run

## 2. Table Lists

Table S1 Screening of Pd sources in the Suzuki coupling reaction using **GO-APTES-FcI-Pd/Co**.<sup>a</sup>

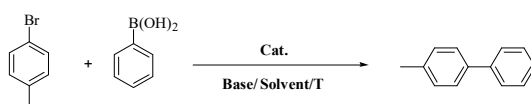

| Pd source                                                               | Base                           | Solvent                    | Time(min) | T(°C) | Isolated yield(%) |
|-------------------------------------------------------------------------|--------------------------------|----------------------------|-----------|-------|-------------------|
| (C <sub>17</sub> H <sub>14</sub> P) <sub>2</sub> Fe · PdCl <sub>2</sub> | K <sub>2</sub> CO <sub>3</sub> | H <sub>2</sub> O:EtOH(1:1) | 120       | 70    | 44                |
| (CF <sub>3</sub> COO) <sub>2</sub> Pd                                   | K <sub>2</sub> CO <sub>3</sub> | H <sub>2</sub> O:EtOH(1:1) | 120       | 70    | 35                |
| PdCl <sub>2</sub>                                                       | K <sub>2</sub> CO <sub>3</sub> | H <sub>2</sub> O:EtOH(1:1) | 120       | 70    | 92                |
| Pd(OAc) <sub>2</sub>                                                    | K <sub>2</sub> CO <sub>3</sub> | H <sub>2</sub> O:EtOH(1:1) | 120       | 70    | 88                |
| (C <sub>6</sub> H <sub>5</sub> CN) <sub>2</sub> PdCl <sub>2</sub>       | K <sub>2</sub> CO <sub>3</sub> | H <sub>2</sub> O:EtOH(1:1) | 120       | 70    | 99                |
| Li <sub>2</sub> PdCl <sub>4</sub>                                       | K <sub>2</sub> CO <sub>3</sub> | H <sub>2</sub> O:EtOH(1:1) | 120       | 70    | 93                |

<sup>a</sup>Reaction condition: PhB(OH)<sub>2</sub> (0.30 mmol), 4-bromotoluene (0.25 mmol), Base (0.5 mmol), **GO-APTES-FcI-Pd/Co** (1mg), solvent (4 mL), temperature (70 °C), 120 min.

Table S2 Optimization of reaction conditions in Suzuki coupling using **GO@APTES-FcI-Pd<sub>0.1</sub>Co<sub>0.9</sub>**.<sup>a</sup>

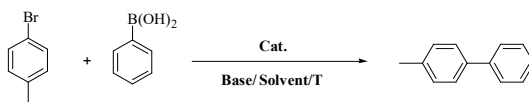

| Entry | Base                            | Solvent                                               | Time (min) | T (°C) | Isolated yield (%) |
|-------|---------------------------------|-------------------------------------------------------|------------|--------|--------------------|
| 1     | K <sub>2</sub> CO <sub>3</sub>  | H <sub>2</sub> O:EtOH(1:1)                            | 120        | 80     | 99                 |
| 2     | K <sub>2</sub> CO <sub>3</sub>  | H <sub>2</sub> O:EtOH(1:1)                            | 120        | 60     | 38                 |
| 3     | K <sub>2</sub> CO <sub>3</sub>  | H <sub>2</sub> O:EtOH(1:1)                            | 120        | 70     | 99                 |
| 4     | K <sub>2</sub> CO <sub>3</sub>  | H <sub>2</sub> O                                      | 120        | 70     | 26                 |
| 5     | K <sub>2</sub> CO <sub>3</sub>  | EtOH                                                  | 120        | 70     | 14                 |
| 6     | K <sub>2</sub> CO <sub>3</sub>  | CH <sub>3</sub> OH                                    | 120        | 70     | 4                  |
| 7     | K <sub>2</sub> CO <sub>3</sub>  | THF                                                   | 120        | 70     | 96                 |
| 8     | K <sub>2</sub> CO <sub>3</sub>  | Toluene                                               | 120        | 70     | 12                 |
| 9     | K <sub>2</sub> CO <sub>3</sub>  | CH <sub>3</sub> COOC <sub>2</sub> H <sub>5</sub> (EA) | 120        | 70     | trace              |
| 10    | K <sub>2</sub> CO <sub>3</sub>  | H <sub>2</sub> O:EtOH(3:1)                            | 120        | 70     | 78                 |
| 11    | K <sub>2</sub> CO <sub>3</sub>  | H <sub>2</sub> O:EtOH(2:1)                            | 120        | 70     | 80                 |
| 12    | K <sub>2</sub> CO <sub>3</sub>  | DMF                                                   | 120        | 70     | 12                 |
| 13    | K <sub>2</sub> CO <sub>3</sub>  | DMSO                                                  | 120        | 70     | 14                 |
| 14    | K <sub>2</sub> CO <sub>3</sub>  | 1,4-Dioxane                                           | 120        | 70     | 11                 |
| 15    | K <sub>2</sub> CO <sub>3</sub>  | H <sub>2</sub> O:EtOH(1:1)                            | 5          | 70     | 10                 |
| 16    | K <sub>2</sub> CO <sub>3</sub>  | H <sub>2</sub> O:EtOH(1:1)                            | 10         | 70     | 13                 |
| 17    | K <sub>2</sub> CO <sub>3</sub>  | H <sub>2</sub> O:EtOH(1:1)                            | 20         | 70     | 40                 |
| 18    | K <sub>2</sub> CO <sub>3</sub>  | H <sub>2</sub> O:EtOH(1:1)                            | 40         | 70     | 42                 |
| 19    | K <sub>2</sub> CO <sub>3</sub>  | H <sub>2</sub> O:EtOH(1:1)                            | 60         | 70     | 86                 |
| 20    | K <sub>2</sub> CO <sub>3</sub>  | H <sub>2</sub> O:EtOH(1:1)                            | 90         | 70     | 91                 |
| 21    | K <sub>2</sub> CO <sub>3</sub>  | H <sub>2</sub> O:EtOH(1:1)                            | 120        | 70     | 99                 |
| 22    | K <sub>2</sub> CO <sub>3</sub>  | H <sub>2</sub> O:EtOH(1:1)                            | 120        | 70     | 99                 |
| 23    | Na <sub>2</sub> CO <sub>3</sub> | H <sub>2</sub> O:EtOH(1:1)                            | 120        | 70     | 89                 |
| 24    | NaHCO <sub>3</sub>              | H <sub>2</sub> O:EtOH(1:1)                            | 120        | 70     | 32                 |
| 25    | NaOH                            | H <sub>2</sub> O:EtOH(1:1)                            | 120        | 70     | 74                 |
| 26    | K <sub>3</sub> PO <sub>4</sub>  | H <sub>2</sub> O:EtOH(1:1)                            | 120        | 70     | 50                 |
| 27    | K <sub>2</sub> CO <sub>3</sub>  | H <sub>2</sub> O:EtOH(1:1)                            | 120        | 70     | 58 <sup>b</sup>    |
| 28    | K <sub>2</sub> CO <sub>3</sub>  | H <sub>2</sub> O:EtOH(1:1)                            | 150        | 70     | 67 <sup>b</sup>    |

<sup>a</sup>Reaction conditions: PhB(OH)<sub>2</sub> (0.30 mmol), 4-bromotoluene (0.25 mmol), Base (0.5 mmol), solvent (4 mL)

at 70 °C ; <sup>b</sup>PhB(OH)<sub>2</sub> (0.55 mmol), 4-bromotoluene (0.50 mmol), Base (1.0 mmol), catalyst: **GO@APTES-Fcl-Pd<sub>0.1</sub>Co<sub>0.9</sub>** (1 mg).

Table S3 Effect of metal types and proportions on the catalytic performance of **GO@APTES-Fcl-Pd/M**.

| Entry | Cat.                                                                 | Solvent                    | Time (min) | T (°C) | Isolated yield (%) | TOF (h <sup>-1</sup> ) |
|-------|----------------------------------------------------------------------|----------------------------|------------|--------|--------------------|------------------------|
| 1     | GO@APTES-Fcl-Pd <sub>0.5</sub> Co <sub>0.5</sub>                     | H <sub>2</sub> O:EtOH(1:1) | 120        | 70     | 96                 | 2280                   |
| 2     | GO@APTES-Fcl-Pd <sub>0.1</sub> Co <sub>0.9</sub>                     | H <sub>2</sub> O:EtOH(1:1) | 120        | 70     | 99                 | 11353                  |
| 3     | GO@APTES-Fcl-Pd <sub>0.07</sub> Co <sub>0.93</sub>                   | H <sub>2</sub> O:EtOH(1:1) | 120        | 70     | 82                 | 2613                   |
| 4     | GO@APTES-Fcl-Pd <sub>0.05</sub> Co <sub>0.95</sub>                   | H <sub>2</sub> O:EtOH(1:1) | 120        | 70     | 16                 | 9878                   |
| 5     | GO@APTES-Fcl-Pd <sub>0.02</sub> Co <sub>0.98</sub>                   | H <sub>2</sub> O:EtOH(1:1) | 120        | 70     | 3                  | 1413                   |
| 6     | GO@APTES-Fcl-Pd <sub>0.1</sub> Cu <sub>0.9</sub>                     | H <sub>2</sub> O:EtOH(1:1) | 120        | 70     | 99                 | 2750                   |
| 7     | GO@APTES-Fcl-Pd <sub>0.1</sub> Ru <sub>0.9</sub>                     | H <sub>2</sub> O:EtOH(1:1) | 120        | 70     | 93                 | 870                    |
| 8     | GO@APTES-Fcl-Pd <sub>0.07</sub> Ru <sub>0.93</sub>                   | H <sub>2</sub> O EtOH(1:1) | 120        | 70     | 99                 | 1767                   |
| 9     | GO@APTES-Fcl-Pd <sub>0.05</sub> Fe <sub>0.95</sub>                   | H <sub>2</sub> O:EtOH(1:1) | 120        | 70     | 19                 | 164                    |
| 10    | GO@APTES-Fcl-Pd <sub>0.1</sub> Fe <sub>0.9</sub>                     | H <sub>2</sub> O:EtOH(1:1) | 120        | 70     | 40                 | 3940                   |
| 11    | GO@APTES-Fcl-Pd <sub>0.5</sub> Fe <sub>0.5</sub>                     | H <sub>2</sub> O:EtOH(1:1) | 120        | 70     | 94                 | 422                    |
| 12    | GO@APTES-Fcl-Pd <sub>0.05</sub> Ni <sub>0.95</sub>                   | H <sub>2</sub> O:EtOH(1:1) | 120        | 70     | 23                 | 2521                   |
| 13    | GO@APTES-Fcl-Pd <sub>0.1</sub> Ni <sub>0.9</sub>                     | H <sub>2</sub> O:EtOH(1:1) | 120        | 70     | 66                 | 43552                  |
| 14    | GO@APTES-Fcl-Pd <sub>0.5</sub> Ni <sub>0.5</sub>                     | H <sub>2</sub> O:EtOH(1:1) | 120        | 70     | 90                 | 499                    |
| 15    | GO@APTES-Fcl-Pd <sub>0.1</sub> Co <sub>0.45</sub> Ni <sub>0.45</sub> | H <sub>2</sub> O:EtOH(1:1) | 120        | 70     | 88                 | 1337                   |

<sup>a</sup>Reaction conditions: PhB(OH)<sub>2</sub> (0.30 mmol), 4-bromotoluene (0.25 mmol), Base (0.5 mmol), **GO@APTES-Fcl-Pd/M** (1 mg), solvent (4 mL), temperature (70 °C).

Table S4 Catalytic activity of different catalytic system in the Suzuki cross coupling reaction <sup>a</sup>

| Entry | Catalyst                                                                                                   | Pd loading(mmol·mg <sup>-1</sup> ) | Yield (%)       | TON/TOF    |
|-------|------------------------------------------------------------------------------------------------------------|------------------------------------|-----------------|------------|
| 1     | GO                                                                                                         | -                                  | 0 <sup>b</sup>  | -          |
| 2     | GO@APTES                                                                                                   | -                                  | 0 <sup>c</sup>  | -          |
| 3     | GO@APTES-Fcl                                                                                               | -                                  | 0 <sup>d</sup>  | -          |
| 4     | (C <sub>6</sub> H <sub>5</sub> CN) <sub>2</sub> PdCl <sub>2</sub> /CoCl <sub>2</sub> ·6H <sub>2</sub> O    | 1.09×10 <sup>-5</sup>              | 69 <sup>e</sup> | 15825/7918 |
| 5     | GO+(C <sub>6</sub> H <sub>5</sub> CN) <sub>2</sub> PdCl <sub>2</sub> /CoCl <sub>2</sub> ·6H <sub>2</sub> O | 1.09×10 <sup>-5</sup>              | 53              | 12155/6078 |

| Entry | Catalyst                                                                                                                 | Pd loading(mmol·mg <sup>-1</sup> ) | Yield (%)       | TON/TOF      |
|-------|--------------------------------------------------------------------------------------------------------------------------|------------------------------------|-----------------|--------------|
| 6     | GO@APTES-Fcl<br>+(C <sub>6</sub> H <sub>5</sub> CN) <sub>2</sub> PdCl <sub>2</sub> /CoCl <sub>2</sub> ·6H <sub>2</sub> O | 1.09×10 <sup>-5</sup>              | 62              | 142201/7110  |
| 7     | Si@APTES-Fcl-Pd <sub>0.1</sub> Co <sub>0.9</sub>                                                                         | 4.16×10 <sup>-7</sup>              | 45 <sup>f</sup> | 130216/10851 |
| 8     | GO@APTES-Fcl-Pd <sub>0.1</sub> Co <sub>0.9</sub>                                                                         | 1.09×10 <sup>-5</sup>              | 99 <sup>g</sup> | 22706/11353  |
| 9     | Si/APTES-Fcl-Pd <sub>0.1</sub> Co <sub>0.9</sub>                                                                         | 1.09×10 <sup>-5</sup>              | 33 <sup>h</sup> | 7568/3784    |

<sup>a</sup>Reaction conditions: PhB(OH)<sub>2</sub> (0.30 mmol), 4-bromotoluene (0.25 mmol), K<sub>2</sub>CO<sub>3</sub> (0.5 mmol), catalyst 1 mg, solvent (50% aqueous alcohol 4 mL) at 70 °C for 2 h. <sup>b</sup>GO 1 mg. <sup>c</sup>GO@APTES 1 mg. <sup>d</sup>GO@APTES-Fcl (1mg). <sup>e</sup>(C<sub>6</sub>H<sub>5</sub>CN)<sub>2</sub>PdCl<sub>2</sub>/CoCl<sub>2</sub>·6H<sub>2</sub>O (1.09×10<sup>-5</sup> mmol). <sup>f</sup>Si@APTES-Fcl-Pd<sub>0.1</sub>Co<sub>0.9</sub> (1×1 cm<sup>2</sup>) for 12 h. <sup>g</sup>GO@APTES-Fcl-Pd<sub>0.1</sub>Co<sub>0.9</sub> (1 mg). <sup>h</sup>Si/APTES-Fcl-Pd<sub>0.1</sub>Co<sub>0.9</sub> (spin-coated film on silicon wafer).

Table S5 Screening of different aryl halides with arylboronic acid in the Suzuki cross coupling reaction <sup>a</sup>

| Entry | Ar-X                                                                                | Ar-B(OH) <sub>2</sub>                                                               | Product                                                                              | Yield(%) |
|-------|-------------------------------------------------------------------------------------|-------------------------------------------------------------------------------------|--------------------------------------------------------------------------------------|----------|
| 1     |    |    |    | 85       |
| 2     |   |   |   | 99       |
| 3     |  |  |  | 89       |
| 4     |  |  |  | 99       |
| 5     |  |  |  | 98       |
| 6     |  |  |  | 99       |
| 7     |  |  |  | 58       |
| 8     |  |  |  | 99       |
| 9     |  |  |  | 97       |
| 10    |  |  |  | 55       |
| 11    |  |  |  | 71       |
| 12    |  |  |  | 62       |
| 13    |  |  |  | 67       |

| Entry | Ar-X                                                                                | Ar-B(OH) <sub>2</sub>                                                               | Product                                                                              | Yield(%)        |
|-------|-------------------------------------------------------------------------------------|-------------------------------------------------------------------------------------|--------------------------------------------------------------------------------------|-----------------|
| 14    | 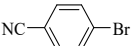   |    |    | 99              |
| 15    |    |    |    | 99              |
| 16    |    |    |    | 99              |
| 17    |    |    |    | trace           |
| 18    |    |    |    | trace           |
| 19    |    |    |    | trace           |
| 20    |    |    |    | trace           |
| 21    |    |    |    | 96              |
| 22    |   |   |  | 81              |
| 23    |  |  |  | 58 <sup>b</sup> |

<sup>a</sup>Reaction conditions: Ar-B(OH)<sub>2</sub> (0.30 mmol), Ar-X (0.25 mmol), Base (0.5 mmol), **GO@APTES-Fcl-Pd<sub>0.1</sub>Co<sub>0.9</sub>** (1 mg), solvent (4 mL) at 70 °C. <sup>b</sup>PhB(OH)<sub>2</sub> (0.55 mmol), 4-bromotoluene (0.50 mmol), Base (1.0 mmol), **GO@APTES-Fcl-Pd<sub>0.1</sub>Co<sub>0.9</sub>** (1 mg).

Table S6 Catalytic performance of the **GO@APTES-Fcl-Pd<sub>0.1</sub>Co<sub>0.9</sub>** in Suzuki coupling reaction compared with other Pd-based catalysts reported

| No. | Catalyst                                                               | Reaction conditions                                                         | X  | Yield (%) | TOF (h <sup>-1</sup> ) | Ref. |
|-----|------------------------------------------------------------------------|-----------------------------------------------------------------------------|----|-----------|------------------------|------|
| 7   | GO-Diimine-Ni/Pd1 (2.2×10 <sup>-6</sup> mol%Pd)                        | H <sub>2</sub> O:EtOH, 70 °C, Na <sub>2</sub> CO <sub>3</sub> , 1h          | Br | 99        | 21277                  | [64] |
| 8   | GO@Fcl-Pd <sub>0.1</sub> Cu <sub>0.9</sub> (0.032 mol%Pd)              | Na <sub>2</sub> CO <sub>3</sub> , H <sub>2</sub> O:EtOH, at 80 °C, 2h       | Br | 99        | 1484375                | [74] |
| 9   | GO@T-Pd <sub>0.01</sub> /Cu <sub>0.99</sub> (0.0033 mol%Pd)            | Na <sub>2</sub> CO <sub>3</sub> , EtOH:H <sub>2</sub> O, 1h, 70 °C          | Br | 99        | 118588                 | [76] |
| 10  | GO@PPD-Pd (0.017 mol%Pd)                                               | K <sub>2</sub> CO <sub>3</sub> , H <sub>2</sub> O:EtOH (1:1), 20 min, 60 °C | Br | 97        | 17118                  | [77] |
| 11  | GO@Apimp-Pd1/Cu <sub>0.5</sub> (0.000145 mol%Pd)                       | K <sub>2</sub> CO <sub>3</sub> , H <sub>2</sub> O:EtOH=1:1, 70 °C, 2h       | Br | 89        | 307320                 | [79] |
| 12  | Fe <sub>3</sub> O <sub>4</sub> @SiO <sub>2</sub> -APBA-Pd (1.2 mol%Pd) | K <sub>2</sub> CO <sub>3</sub> , H <sub>2</sub> O:EtOH, 60 °C               | Br | 97        | 6230                   | [89] |

|    |                                                               |                                                                              |    |    |       |       |
|----|---------------------------------------------------------------|------------------------------------------------------------------------------|----|----|-------|-------|
| 13 | GO@NHC-Pd<br>(0.01 mol%Pd)                                    | K <sub>2</sub> CO <sub>3</sub> , C <sub>2</sub> H <sub>5</sub> OH, 50 °C, 1h | Br | 92 | 1823  | [90]  |
| 14 | Pd/Fe <sub>3</sub> O <sub>4</sub> /s-G<br>(0.3 mol%Pd)        | K <sub>2</sub> CO <sub>3</sub> , EtOH:H <sub>2</sub> O, 30 min,<br>80 °C     | Br | 97 | 1293  | [91]  |
| 15 | Pd <sub>0.5</sub> Ru <sub>0.5</sub> -PVP NPs<br>(0.16 mol%Pd) | K <sub>2</sub> CO <sub>3</sub> , DMA:H <sub>2</sub> O, 100 °C,<br>0.08h      | Br | 96 | 15000 | [92]  |
| 16 | GO-Fe <sub>3</sub> O <sub>4</sub> /Pd<br>(0.5 mol%Pd)         | K <sub>2</sub> CO <sub>3</sub> , H <sub>2</sub> O:EtOH, 80 °C,<br>0.15h      | I  | 95 | 1140  | [93]  |
| 17 | Pd/CoO-C<br>(1.2 mol%Pd)                                      | K <sub>2</sub> CO <sub>3</sub> , H <sub>2</sub> O, at 80 °C, 4h              | Br | 96 | 28    | [108] |

Table S7 Poisoning experiments of GO@APTES-Fcl-Pd<sub>0.1</sub>Co<sub>0.9</sub><sup>a</sup>

| Entry | Poisoning additive | Isolated yield (%) |
|-------|--------------------|--------------------|
| 1     | ---                | 99 <sup>a</sup>    |
| 2     | 2, 2'-Dipyridyl    | trace <sup>b</sup> |
| 3     | Thiophene          | 40 <sup>c</sup>    |

<sup>a</sup>Reaction conditions: 4-bromotoluene (0.25 mmol), Phenylboric acid (0.3 mmol), K<sub>2</sub>CO<sub>3</sub> (1 mmol), GO@APTES-Fcl-Pd<sub>0.1</sub>Co<sub>0.9</sub> 1 mg, solvent (4 mL) at 70 °C for 120 min. <sup>b</sup> 0.5 equiv of 2,2'-Dipyridyl (per metal atom). <sup>c</sup> 0.5 equiv of Thiophene (per metal atom).

Table S8 The BE changes of Pd, Co, and Fe on the surface of GO@APTES-Fcl-Pd<sub>0.1</sub>Co<sub>0.9</sub> during catalysis

| Time(min)        | 0      | 5      | 10     | 20     | 40     | 60     | 90     | 120    |
|------------------|--------|--------|--------|--------|--------|--------|--------|--------|
| Pd <sup>0</sup>  | 335.85 | 335.95 | 335.55 | 335.20 | 335.00 | 335.10 | 335.45 | 335.41 |
| Pd <sup>2+</sup> | 338.35 | 338.65 | 338.66 | 338.72 | 338.50 | 338.49 | 338.46 | 338.59 |
| Co <sup>3+</sup> | 780.56 | 780.60 | 779.55 | 780.66 | 780.73 | 780.40 | 779.64 | 780.15 |
| Co <sup>2+</sup> | 782.04 | 782.29 | 782.15 | 782.52 | 782.84 | 782.59 | 781.81 | 782.59 |
| Fe <sup>2+</sup> | 708.16 | 707.89 | 708.32 | 708.21 | 709.27 | 708.41 | 708.10 | 708.26 |
| Fe <sup>3+</sup> | 712.19 | 712.33 | 712.22 | 712.18 | 712.13 | 713.93 | 712.78 | 712.07 |

Table S9 The BE changes of Pd, Co, and Fe on the surface of GO@APTES-Fcl-Pd<sub>0.1</sub>Co<sub>0.9</sub> in

recycling

---

| Recycle(Times)   | 0      | 1      | 2      | 4      | 6      | 8      |
|------------------|--------|--------|--------|--------|--------|--------|
| Pd0              | 335.85 | 335.41 | 335.43 | 335.74 | 335.51 | 335.71 |
| Pd <sup>2+</sup> | 338.38 | 338.59 | 337.99 | 338.02 | 337.92 | 337.89 |
| Co <sup>3+</sup> | 780.56 | 780.15 | 781.49 | 781.42 | 780.53 | 781.61 |
| Co <sup>2+</sup> | 782.04 | 782.59 | 783.29 | 782.92 | 782.18 | 783.34 |
| Fe <sup>2+</sup> | 708.16 | 708.26 | 709.01 | 708.58 | 710.02 | 711.12 |
| Fe <sup>3+</sup> | 712.19 | 712.07 | 712.58 | 712.90 | 712.92 | 713.44 |

---
